# Supplementary material for: Factors Associated with Mortality in Severe Acute Cholangitis in a Moroccan Intensive Care Unit: A Retrospective Analysis of 140 Cases
Source: Hindawi journal article supplement (doi:10.1155/2021/4583493), 2021-01-27
Supplement: f1 [file 4583493.f1.zip]

## Protocole simplifié de prise en charge des angiocholites aiguës graves

L'organisation de la prise en charge, **multidisciplinaire**, doit se faire en étroite collaboration entre anesthésistes-réanimateurs, radiologues, endoscopistes, chirurgiens et microbiologistes selon un protocole codifié et adapté à chaque structure de soins.

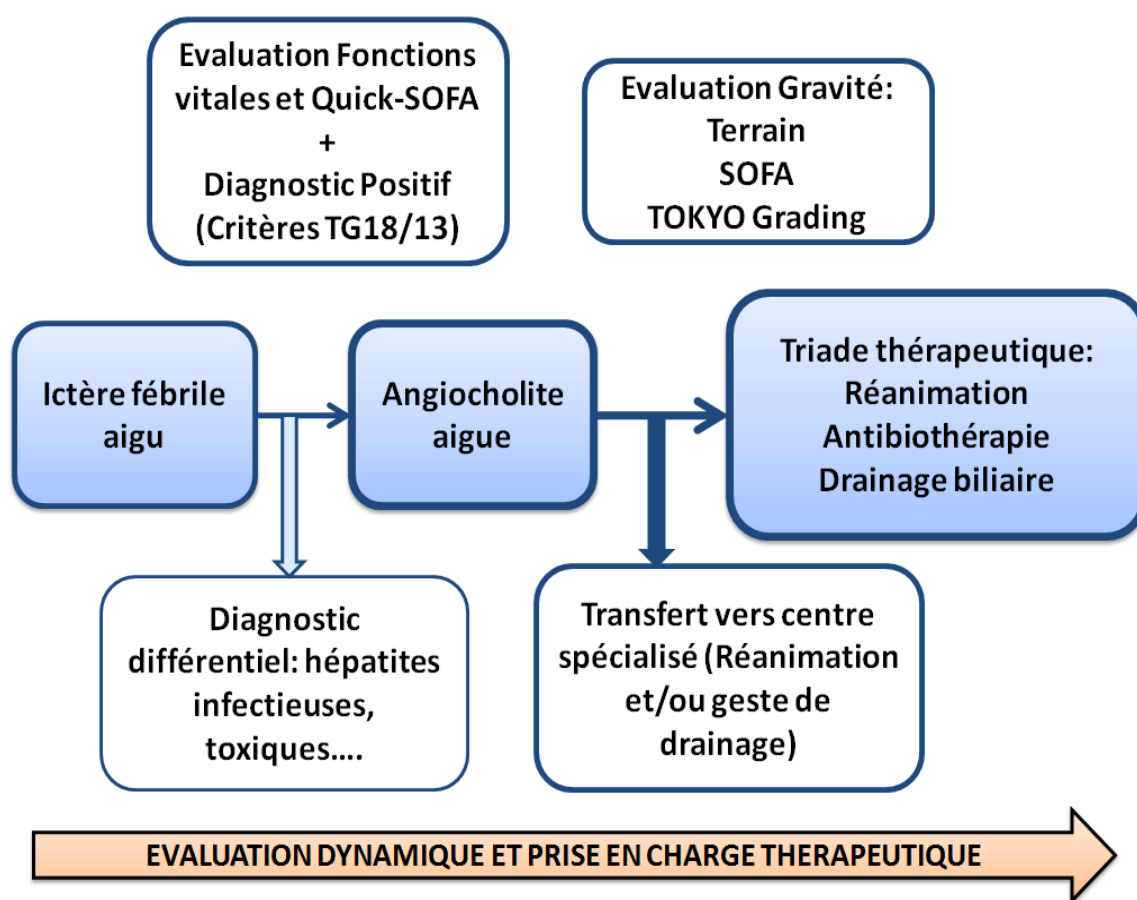

Organigramme de prise en charge de l'angiocholite aiguë grave  
(Adapté des Tokyo Guidelines 2018)

## → CONFIRMATION DIAGNOSTIQUE

☐ Dès suspicion du diagnostic d'angiocholite aigu → **Critères diagnostiques**

**TG18/TG13**

☐ Si diagnostic définitif difficile, réévaluer le patient toutes les 6 à 12 h en utilisant les critères diagnostiques, pour le confirmer.

**Critères diagnostiques de Tokyo (TG18/TG13) pour l'angiocholite aiguë.**

### A. Inflammation systémique

**A-1/ Fièvre** (Température > 38°) **et / ou frissons.**

**A-2/Réponse inflammatoire systémique** : Leucocytes <4000 ou >10000 éléments/mm<sup>3</sup>, CRP ≥ 10 mg/l.

### B. Cholestase

**B-1/ Clinique** : Ictère et Bilirubine Totale ≥ 20 mg/l.

**B-2/ Biologique** : Bilan hépatique perturbé : ASAT, ALAT, PAL, GGT (> 1,5 × N)

### C. Imagerie

**C-1/ Dilatation** des voies biliaires.

**C-2/ Evidence étiologique**: obstacle visible (calcul, sténose, prothèse,...).

**Diagnostic suspecté** si: 1 critère A + 1 critère B ou C

**Diagnostic confirmé** si: 1 critère A + 1 critère B + 1 critère C

**A-2** : Taux anormal de leucocytes, augmentation de la CRP ou d'autres indicateurs de l'inflammation.

**B-2** : Augmentations du taux sérique des enzymes hépatiques (ASAT, ALAT, GGT, PAL)

D'autres facteurs peuvent contribuer au diagnostic de l'angiocholite aiguë : colique hépatique, antécédent d'une pathologie biliaire (calculs biliaires, prothèse biliaire, intervention sur les voies biliaires).

L'hépatite aiguë s'associe rarement à une réponse inflammatoire systémique marquée. Les sérologies virales sont recommandées en cas de diagnostic différentiel difficile.

**C** : **Echographie hépatobiliaire** en première intention.

TDM abdominale, Bili-IRM, échoendoscopie en deuxième intention.

## → EVALUATION DE LA GRAVITE

- ☐ Avant confirmation diagnostique → Evaluation clinique de la gravité : **quick-SOFA**.

|                                                 |         |
|-------------------------------------------------|---------|
| Hypotension artérielle ( $PAS \leq 100$ mmHg)   | 1 point |
| Fréquence respiratoire élevée ( $\geq 22$ /min) | 1 point |
| Altération de conscience ( $GCS \leq 14$ )      | 1 point |

- ☐ Si quick-SOFA  $\geq 1$  → Admission en unité de soins intensifs + mise en condition :

- ✓ Monitoring standard : ECG, SpO<sub>2</sub>, pression artérielle non invasive.
- ✓ Oxygénothérapie.
- ✓ Position demi-assise si détresse respiratoire et/ou neurologique, lever de jambes si détresse hémodynamique.
- ✓ 2 voies veineuses périphériques.
- ✓ Antalgiques (Eviter AINS).
- ✓ Bilan biologique et réanimation hydro électrolytique initiale (Cristalloïdes +++)
- ✓ Réévaluation ± Transfert.

- ☐ Dès confirmation du diagnostic d'angiocholite aigu → **Critères de gravité TG18/TG13.**

- ☐ Si angiocholite aiguë grave Grade III et/ou terrain particulier → Prise en charge en milieu de réanimation spécialisée.

- ☐ **Cinétique du score de SOFA** pendant le séjour en réanimation: au moment du diagnostic, dans les 24 h après le diagnostic puis toutes les 24 heures.

## Critères de gravité de l'angiocholite aigue TG18/TG13

**Grade III (Sévère) : Si angiocholite aigue + au moins 1 défaillance d'organes parmi les défaillances suivantes :**

- ➔ **Cardiovasculaire:** Hypotension nécessitant le recours aux vasopresseurs.
- ➔ **Neurologique:** Trouble de conscience.
- ➔ **Respiratoire:** Détresse respiratoire aigue avec un rapport  $\text{PaO}_2/\text{FiO}_2 < 300$ .
- ➔ **Rénale:** Oligurie, taux de créatinine  $> 20 \text{ mg/l}$ .
- ➔ **Hépatique:** TP-INR  $> 1.5$ .
- ➔ **Hématologique:** Taux de plaquettes  $< 100,000/\text{mm}^3$ .

**Grade II (Modérée) : Si angiocholite aigue associée à 2 des critères suivants :**

- ➔ Hyperleucocytose ou leucopénie ( $> 12,000/\text{mm}^3$  ou  $< 4000/\text{mm}^3$ ).
- ➔ Fièvre  $\geq 39^\circ\text{C}$ .
- ➔ Age  $> 75$  ans.
- ➔ Hyper bilirubinémie (Taux de bilirubine totale  $> 50 \text{ mg/l}$ ).
- ➔ Hypo albuminémie ( $< 0.7 \times \text{N}$ ).

**Grade I (Légère) : Si aucun des critères Grade III ni Grade II n'est présent au moment du diagnostic**

| Score de SOFA (Sequential Organ Failure Assessment)                                        |                    |                    |                                        |                                             |                                |
|--------------------------------------------------------------------------------------------|--------------------|--------------------|----------------------------------------|---------------------------------------------|--------------------------------|
| Variables/Score                                                                            | 0                  | 1                  | 2                                      | 3                                           | 4                              |
| $\text{PaO}_2/\text{FiO}_2$<br>(mmHg)                                                      | $> 400$            | $\leq 400$         | $\leq 300$                             | $\leq 200$                                  | $\leq 100$                     |
| Plaquettes<br>( $\times 10^3/\text{mm}^3$ )                                                | $> 150$            | $\leq 150$         | $\leq 100$                             | $\leq 50$                                   | $\leq 20$                      |
| Bilirubine (mg/l)                                                                          | $< 12$             | 12 - 19            | 20 - 59                                | 60 - 119                                    | $> 120$                        |
| Cardiovasculaire<br>( $\mu\text{g/kg/min}$ )                                               | Pas<br>hypotension | PAM $< 70$<br>mmHg | Dopa $\leq 5$ or<br>Dobu (any<br>dose) | Dopa $> 5$ or nora<br>$\leq 0,1$            | Dopa $> 15$ or<br>nora $> 0,1$ |
| Glasgow Coma<br>Scale                                                                      | 15                 | 13 - 14            | 10 - 12                                | 6 - 9                                       | $< 6$                          |
| Créatinine (mg/l)<br>Ou diurèse                                                            | $< 12$             | 12 - 19            | 20 - 34                                | 35 - 49<br>ou $< 500 \text{ ml}/24\text{h}$ | $> 50$<br>ou $< 200$<br>ml/24h |
| PAM : Pression artérielle moyenne, Dopa : Dopamine, Dobu: Dobutamine, Nora : Noradrénaline |                    |                    |                                        |                                             |                                |

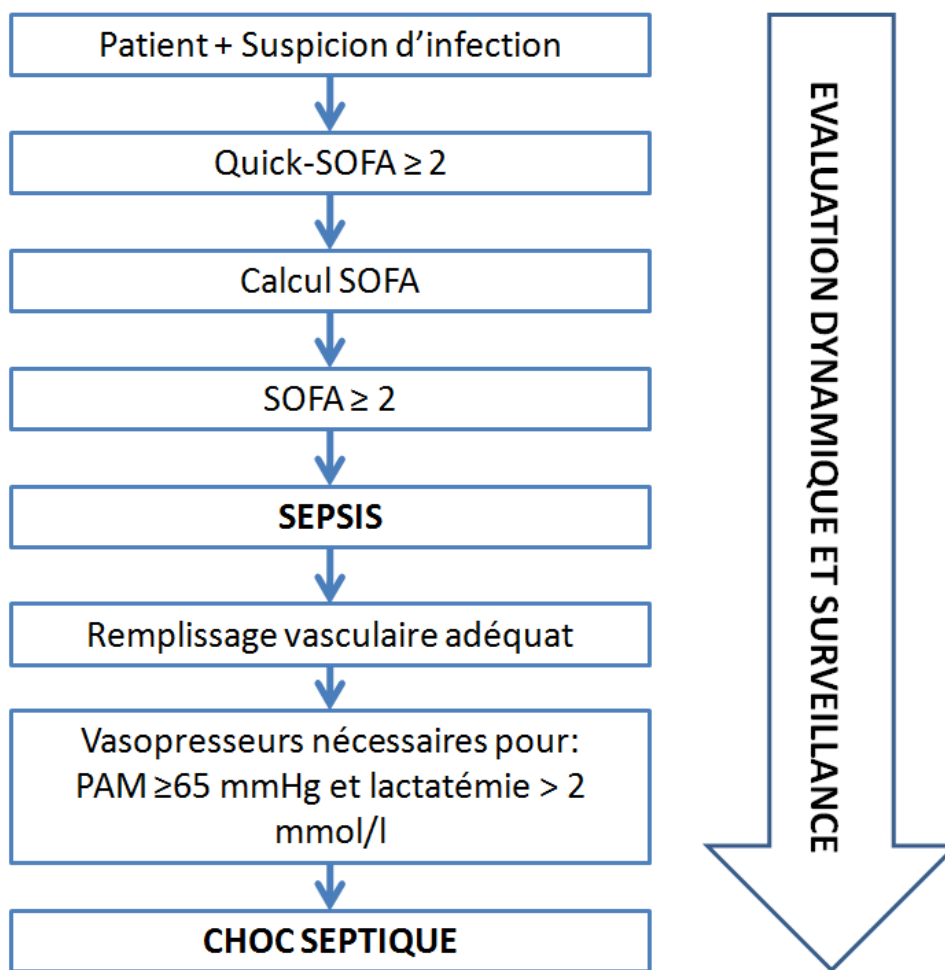

## ➔ PRISE EN CHARGE THERAPEUTIQUE

□ Si réanimation spécialisée et/ou plateau technique pour drainage biliaire indisponible :

- ✓ Mise en condition initiale.
- ✓ Réanimation hydro électrolytique et démarrer antibiothérapie.
- ✓ Transfert régulé vers une structure spécialisée.

| <b>MESURES DE REANIMATION</b>             |                                                                                                                                                                                                                                                                                                                                                                                                                                                                                               |
|-------------------------------------------|-----------------------------------------------------------------------------------------------------------------------------------------------------------------------------------------------------------------------------------------------------------------------------------------------------------------------------------------------------------------------------------------------------------------------------------------------------------------------------------------------|
| <b>Timing</b>                             | Dès suspicion du diagnostic                                                                                                                                                                                                                                                                                                                                                                                                                                                                   |
| <b>Monitoring</b>                         | <ul style="list-style-type: none"> <li>• Standard : ECG, SpO<sub>2</sub>, Pression non invasive, diurèse, température, glycémie capillaire, 2 VVP</li> <li>• Avancé : Abord veineux central, pression artérielle invasive, PVC, débit cardiaque</li> <li>• Biologique (personnalisé): NFS + plaquettes bilan hépatique, fonction rénale, bilan d'hémostase, bilan électrolytique et glycémie, CRP, groupage ABO-Rhésus, lactates, procalcitonine, gaz de sang artériel et veineux.</li> </ul> |
| <b>Réanimation liquidienne</b>            | <ul style="list-style-type: none"> <li>• Cristalloïdes : Sérum salé 0,9%, Ringer lactate</li> <li>• Commencer par 30ml/kg puis continuer si réponse hémodynamique positive et absence de surcharge pulmonaire.</li> <li>• Colloïdes proscrits.</li> </ul>                                                                                                                                                                                                                                     |
| <b>Traitement vasopresseur ± inotrope</b> | <ul style="list-style-type: none"> <li>• Noradrénaline et/ou adrénaline</li> <li>• Objectif PAM <math>\geq</math> 65 mmHg et lactates <math>&lt;</math> 2 mmol/l</li> <li>• Dobutamine si défaillance cardiaque à l'échocardiographie + signes clinico-biologiques de bas débit.</li> </ul>                                                                                                                                                                                                   |
| <b>PEC respiratoire</b>                   | <ul style="list-style-type: none"> <li>• Oxygénothérapie</li> <li>• Ventilation mécanique protectrice si nécessaire</li> </ul>                                                                                                                                                                                                                                                                                                                                                                |
| <b>Traitement antalgique</b>              | <ul style="list-style-type: none"> <li>• Eviter AINS</li> </ul>                                                                                                                                                                                                                                                                                                                                                                                                                               |
| <b>Traitements adjuvants</b>              | <ul style="list-style-type: none"> <li>• HSHC 200mg/j si choc réfractaire</li> <li>• Insulinothérapie pour une glycémie <math>&lt;</math> 1,8 g/L</li> <li>• Produits sanguins, vitamine K et facteurs de coagulation</li> <li>• PEC nutritionnelle</li> <li>• Prophylaxie antithrombotique, de l'ulcère lié au stress</li> <li>• Epuration extra rénale si indication rénale</li> </ul>                                                                                                      |

| TRAITEMENT ANTIBIOTIQUE                                                                                                                                                           |                                                                                                                                                                                                                                                                                                                                                       |                                                                                                                                                                                                                                                |
|-----------------------------------------------------------------------------------------------------------------------------------------------------------------------------------|-------------------------------------------------------------------------------------------------------------------------------------------------------------------------------------------------------------------------------------------------------------------------------------------------------------------------------------------------------|------------------------------------------------------------------------------------------------------------------------------------------------------------------------------------------------------------------------------------------------|
| Timing                                                                                                                                                                            |                                                                                                                                                                                                                                                                                                                                                       | Dans l'heure                                                                                                                                                                                                                                   |
| Voie d'administration                                                                                                                                                             |                                                                                                                                                                                                                                                                                                                                                       | Injectable intraveineuse                                                                                                                                                                                                                       |
| Molécules<br>(Traitement empirique)                                                                                                                                               | Angiocholite aiguë communautaire grave                                                                                                                                                                                                                                                                                                                | Ceftriaxone + Métronidazole                                                                                                                                                                                                                    |
|                                                                                                                                                                                   | Angiocholite aiguë grave associée aux soins / après CPRE                                                                                                                                                                                                                                                                                              | Pipéracilline/tazobactam<br><b>Ou</b><br>Ceftazidime + Métronidazole<br><b>Ou</b><br>Carbapénème (Imipénème ou Ertapénème)<br>$\pm$<br>Vancomycine si suspicion d' <i>Entérocoque Faecium</i><br>(ou Tigécycline si allergie à la vancomycine) |
| Antibiothérapie <b>initialement empirique</b> puis <b>secondairement adaptée</b> aux résultats des cultures et d'antibiogrammes ( <b>prélèvement de bile</b> et/ou hémocultures). |                                                                                                                                                                                                                                                                                                                                                       |                                                                                                                                                                                                                                                |
| Durée du traitement antibiotique                                                                                                                                                  | ✓ <b>4 à 7 jours</b> si la source infectieuse est contrôlée (= drainage efficace et fonctionnel).<br>✓ <b>7 à 10 jours</b> si angiocholite survenant sur prothèse biliaire et obstruction levée.<br>✓ <b>15 jours minimum</b> si présence <b>confirmée</b> de Cocci Gram + type entérocoque ou streptocoque (vu le risque d'endocardite infectieuse). |                                                                                                                                                                                                                                                |

| <b>DRAINAGE BILAIRE</b>                 |                                                                                                                                                                                                                                                                                                                                                                                                                                                                                                                                                                                                                                                                                                                                                                                                                                                                          |
|-----------------------------------------|--------------------------------------------------------------------------------------------------------------------------------------------------------------------------------------------------------------------------------------------------------------------------------------------------------------------------------------------------------------------------------------------------------------------------------------------------------------------------------------------------------------------------------------------------------------------------------------------------------------------------------------------------------------------------------------------------------------------------------------------------------------------------------------------------------------------------------------------------------------------------|
| <b>Timing</b>                           | En urgence sans délai                                                                                                                                                                                                                                                                                                                                                                                                                                                                                                                                                                                                                                                                                                                                                                                                                                                    |
| <b>Méthode de drainage</b>              | <ul style="list-style-type: none"> <li>- Endoscopique transpapillaire par CPRE.</li> <li>- Percutané échoguidé si échec ou indisponibilité de la CPRE.</li> <li>- Chirurgical si échec ou indisponibilité des 2 premières.</li> </ul>                                                                                                                                                                                                                                                                                                                                                                                                                                                                                                                                                                                                                                    |
| <b>Méthode de drainage endoscopique</b> | <p>Dépend de l'état du patient, de l'existence d'une coagulopathie et de la maîtrise de l'endoscopiste.</p> <p>± Drainage nasobilaire externe ou drainage interne par prothèse.</p> <p>± Sphinctérotomie.</p> <p>± Dilatation papillaire.</p>                                                                                                                                                                                                                                                                                                                                                                                                                                                                                                                                                                                                                            |
| <b>Impératifs pour le geste</b>         | <ul style="list-style-type: none"> <li>- Information du patient et de sa famille.</li> <li>- Monitoring standard minimal : ECG, SpO2, Pression artérielle non invasive, diurèse, 2 voies veineuses périphériques.</li> <li>- Mesures de réanimation initiées (remplissage vasculaire, drogues vasoactives, transfusion, vitamine K, facteurs de coagulation ...)</li> <li>- Antibiothérapie administrée</li> <li>- Anesthésie générale avec contrôle des voies aériennes pour les drainages endoscopique et chirurgical.</li> <li>- Vigilance et communication avec l'opérateur (endoscopiste, radiologue interventionnel ou chirurgien).</li> <li>- Prélèvement de bile per geste obligatoire.</li> <li>- Surveillance des complications post geste : hémorragiques, septiques par décharges bactériennes ou perforation digestive, pancréatite post CPRE...</li> </ul> |
