# Supplementary material for: Factors Associated with Mortality in Severe Acute Cholangitis in a Moroccan Intensive Care Unit: A Retrospective Analysis of 140 Cases
Source: Gastroenterol Res Pract. 2021 Jan 27;2021:4583493. doi: 10.1155/2021/4583493 (PMC7861946; doi:10.1155/2021/4583493)
Supplement: Supplementary Materials — The file includes our local contextualized procedure for the management of severe acute cholangitis and is provided both in its original language (French) and in English. [file 4583493.f1.zip]

Archive with 2 entries (2 files):
- Local protocol for the management of severe acute cholangitis (French Version).pdf
- Simplified local protocol for the management of severe acute cholangitis (English Version).docx
